# Supplementary material
Source: PubMed Central journal article supplement (PMC9411120)
Supplement: 41597_2022_1623_MOESM1_ESM.pdf [file 41597_2022_1623_MOESM1_ESM.pdf]

Supplemental Table 1: Comparison of the NIMH Healthy Research Volunteer dataset demographics with that of the surrounding Montgomery County, Maryland, based on 2020 census data (<https://data.census.gov>).

|                               | Montgomery County, MD | NIMH Dataset |
|-------------------------------|-----------------------|--------------|
| <b>Age</b>                    |                       |              |
| Median Age                    | 39.4                  | 33           |
| Minimum Age                   |                       | 18           |
| Maximum Age                   |                       | 89           |
| <b>Sex</b>                    |                       |              |
| % Female                      | 51.6%                 | 65.2%        |
| <b>Race</b>                   |                       |              |
| White                         | 76.3%                 | 69.5%        |
| Black/African American        | 13.4%                 | 14.5%        |
| American Indian/Alaska Native | 1.3%                  | 0.5%         |
| Asian                         | 5.9%                  | 10.2%        |
| Hawaiian/Pacific Islander     | 0.2%                  | 0.0%         |
| Mixed                         | 2.8%                  | 4.8%         |
| <b>Ethnicity</b>              |                       |              |
| Hispanic                      | 18.5%                 | 9.0%         |
| <b>Education</b>              |                       |              |
| Bachelors degree or above     | 59.2%                 | 84.9%        |
| <b>Income</b>                 |                       |              |
| <10k                          | 3.40%                 | 6.20%        |
| 10-15k                        | 1.80%                 | 2.00%        |
| 15-25k                        | 4.00%                 | 2.80%        |
| 25-35k                        | 4.80%                 | 11.90%       |
| 35-50k                        | 6.70%                 | 7.80%        |
| 50-75k                        | 12.50%                | 17.90%       |
| 75-100k                       | 11.60%                | 13.90%       |
| 100-150k                      | 19.20%                | 16.30%       |
| 150-200k                      | 12.70%                | 9.70%        |
| >200k                         | 23.50%                | 11.60%       |
| <b>Employment</b>             |                       |              |
| In civilian labor force       | 70.5%                 |              |
| full-time                     |                       | 62.0%        |
| part-time                     |                       | 11.1%        |
| student                       |                       | 11.4%        |
| Work on NIH campus            |                       | 11.4%        |

Supplemental Table 2: Name of each MRI scan and the number of participants completing each for data shared in the sourcedirectory. Note that parameters may not be uniform across all images; relevant parameters can be extracted from the included .json files.

| Modality        | Series Description                               | Image Type              | Count |
|-----------------|--------------------------------------------------|-------------------------|-------|
| T1w             | acq-MPRAGE_rec-SCIC                              | only SCIC available     | 2     |
| T1w HighResHipp | acq-HighResHippo_T1w                             |                         | 2     |
| 2D FLAIR        | acq-2d_rec-SCIC_FLAIR                            | only SCIC available     | 12    |
| 3D FLAIR        | acq-Sagittal_rec-SCIC or acq-VariableTE_rec-SCIC | only SCIC available     | 22    |
| T2*             | rec-SCIC_T2starw                                 | only SCIC available     | 8     |
| ASL             | asl                                              | eyes open               | 12    |
| DTI             | dir-unflipped_dwi                                | 24 directions (reverse) | 15    |
|                 | dir-flipped_dwi                                  | 48 directions (primary) | 20    |
| rsfMRI          | dir-forward_bold                                 | Forward                 | 11    |
|                 | dir-reverse_bold                                 | Reverse                 | 1     |

Supplemental Table 2: Details regarding the timing of each MEG task paradigm. Total durations are approximate due to variable jittering in the timing for each trial.

|                      | Trial Categories     | Number of Blocks | Trials per block | Total Trials | Trial Components | Stimulus Duration | Post-stim fixation/ISI | Total Duration (approximate) |
|----------------------|----------------------|------------------|------------------|--------------|------------------|-------------------|------------------------|------------------------------|
| Rest                 |                      |                  |                  |              |                  |                   |                        | 6 min                        |
| Naturalistic Viewing | Movie "Groeï/Growth" |                  |                  |              |                  |                   |                        | 8.5 min                      |
| Artifact             | Prompt               |                  |                  | 6            |                  | 2s                | 2s                     | 24 s                         |
| Oddball              | Standard             |                  |                  | 210          |                  | 50ms              | 950ms + jitter         | 5.67 min                     |
|                      | Target               |                  |                  | 45           |                  | 50ms              | 950ms + jitter         |                              |
|                      | Distractor           |                  |                  | 45           |                  | 50ms              | 950ms + jitter         |                              |
| Go/No-go             | Go                   |                  |                  | 200          |                  | 200ms             | 967ms                  | 5.8 min                      |
|                      | No-Go                |                  |                  | 100          |                  | 200ms             | 967ms                  |                              |
| Airpuff              | Stim                 |                  |                  | 425          |                  | 50ms              | 450ms                  | 4 min                        |
|                      | Missing Stim         |                  |                  | 75           |                  | 50ms              | 450ms                  |                              |
| Hariri Hammer        | Faces                | 3                | 30               | 90           | Target           | 1000ms            | 500ms                  | 10.3 min                     |
|                      |                      |                  |                  |              | Probe            | 1000ms            | 1500ms + jitter        |                              |
|                      | Shapes               | 4                | 15               | 60           | Target           | 1000ms            | 500ms                  |                              |
|                      |                      |                  |                  |              | Probe            | 1000ms            | 1500ms + jitter        |                              |
| Sternberg            | 4 Character String   | 4                | 10               | 40           | Target           | 2000ms            | 3000ms                 | 11 min                       |
|                      |                      |                  |                  |              | Probe            | 1000ms            | 1500ms                 |                              |
|                      | 6 Character String   | 4                | 10               | 40           | Target           | 2000ms            | 3000ms                 |                              |
|                      |                      |                  |                  |              | Probe            | 1000ms            | 1500ms                 |                              |
